# Supplementary material for: Porphyrin-based metal–organic frameworks: protonation induced Q band absorption
Source: Royal Society of Chemistry journal article supplement (doi:10.1039/c9nr02463h), 2019-01-01
Supplement: c9nr02463h1.pdf [file c9nr02463h1.pdf]

## **Porphyrin-Based Metal-Organic Frameworks: Hydrogen**

### **Protonation Induced Q band Absorption**

Yuewu Zhao,<sup>a</sup> Xue Cai,<sup>a,c</sup> Ye Zhang,<sup>a</sup> Changchong Chen,<sup>a</sup> Jine Wang,<sup>\*,a</sup> and Renjun

Pei<sup>\*,a,b</sup>

<sup>a</sup>CAS Key Laboratory of Nano-Bio Interface, Suzhou Institute of Nano-Tech and Nano-Bionics,  
Chinese Academy of Sciences, Suzhou, 215123, China.

<sup>b</sup>School of Nano Technology and Nano Bionics, University of Science and Technology of China,  
Hefei, 230026, China.

<sup>c</sup>Department of Obstetrics and Gynecology, The Second Affiliated Hospital of Soochow  
University, Suzhou, 215004, China.

E-mail: jewang2012@sinano.ac.cn; rjpei2011@sinano.ac.cn; Tel: +86-512-62872776.

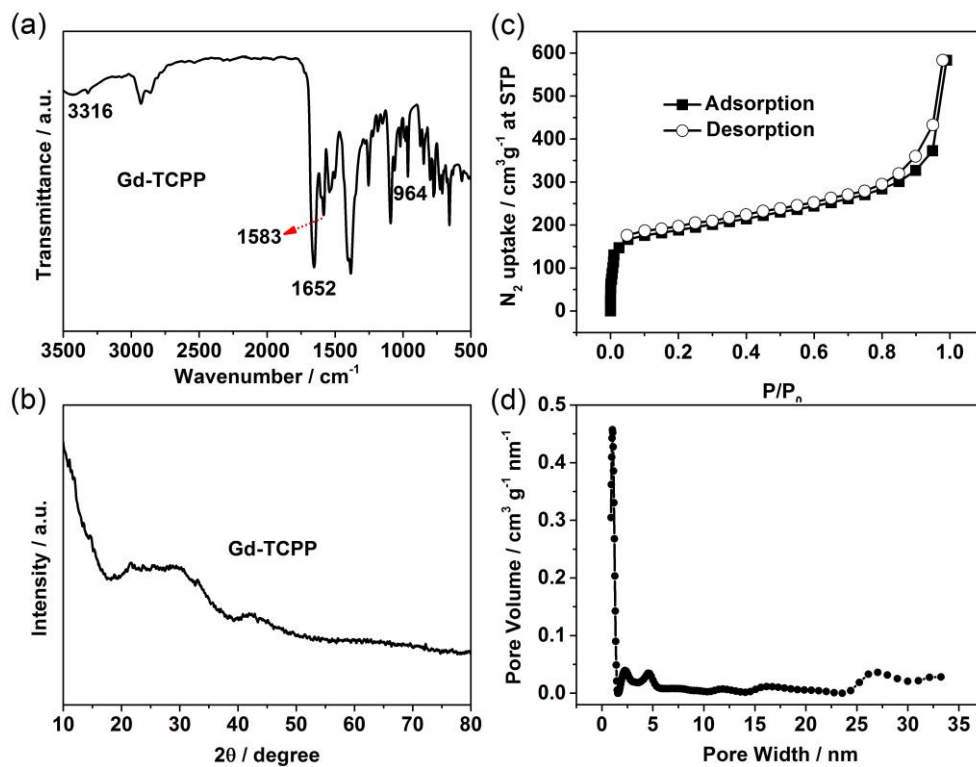

**Figure S1.** (a) FT-IR, (b) XRD, (c) N<sub>2</sub> adsorption-desorption isotherms, and (d) pore size distribution of the prepared Gd-TCPP MOFs nanosheets. The Gd-TCPP shows an approximate type I Langmuir isotherms with a Brunauer-Emmett-Teller surface area of 646.4 m<sup>2</sup> g<sup>-1</sup>.

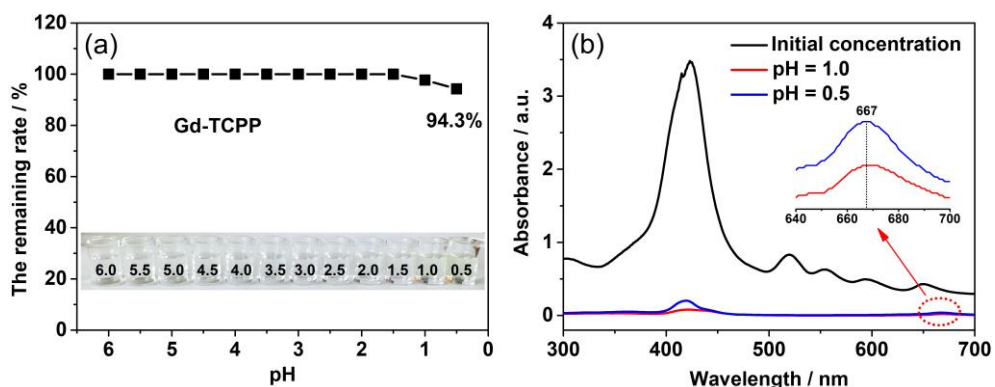

**Figure S2.** (a) Remaining rate of Gd-TCPP MOFs nanosheets obtained by hydrochloric acid treatment and centrifugation with the different pH. Inset is the photograph of supernatants obtained after hydrochloric acid treatment and centrifugation. (b) UV-vis absorption of the initial concentration of Gd-TCPP MOFs nanosheets, and UV-vis absorption of the residues in the solution after hydrochloric acid treatment and centrifugation at pH=0.5, 1.

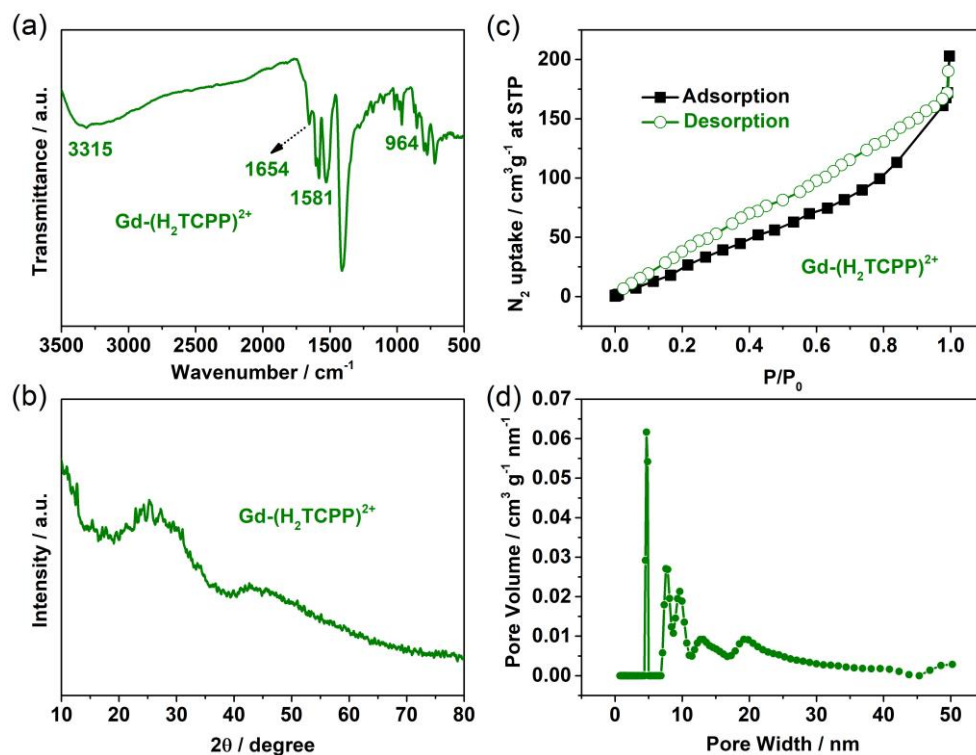

**Figure S3.** (a) FT-IR, (b) XRD, (c) N<sub>2</sub> adsorption-desorption isotherms, and (d) pore size distribution of the Gd-(H<sub>2</sub>TCPP)<sup>2+</sup>. The Gd-(H<sub>2</sub>TCPP)<sup>2+</sup> showed an approximate type II Langmuir isotherms with a Brunauer-Emmett-Teller (BET) surface area of 169.96 m<sup>2</sup> g<sup>-1</sup>.

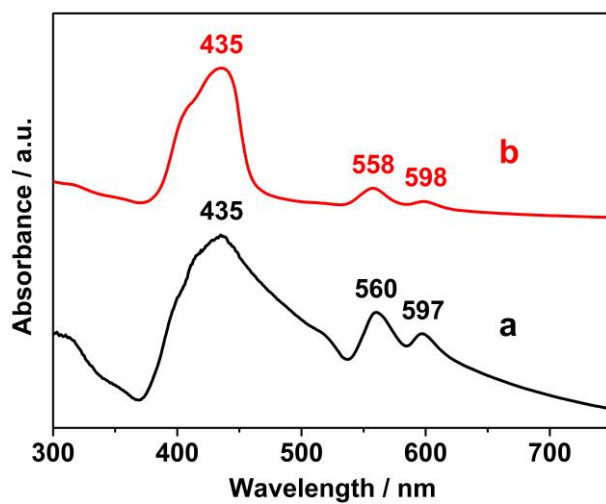

**Figure S4.** UV-vis absorption of (a) Zn-TCPP MOFs nanosheets and (b) acid-treated Zn-TCPP MOFs nanosheets.

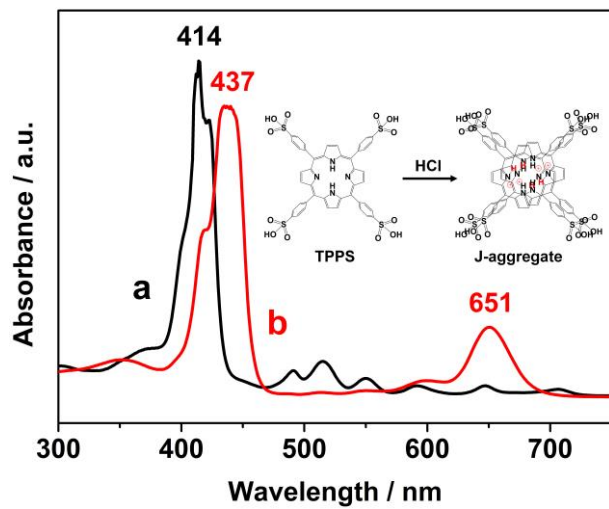

**Figure S5.** UV-vis absorption of (a) TPPS and (b) acid-treated TPPS.

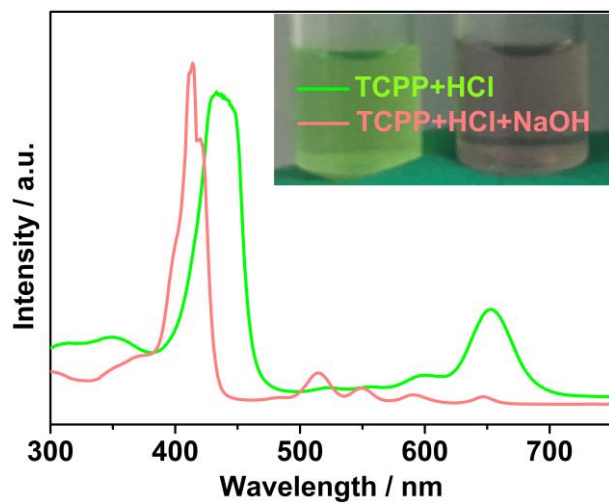

**Figure S6.** UV-vis absorption and photograph of the acid-treated and recovered TCPP.

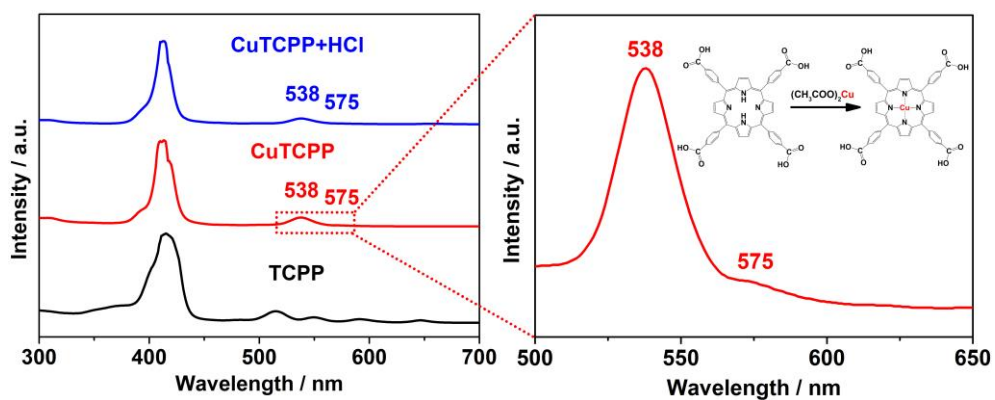

**Figure S7.** UV-vis absorption of TCP, CuTCP, and acid-treated CuTCP (pH=1.0).

The CuTCP was prepared by reacting TCP with copper acetate.



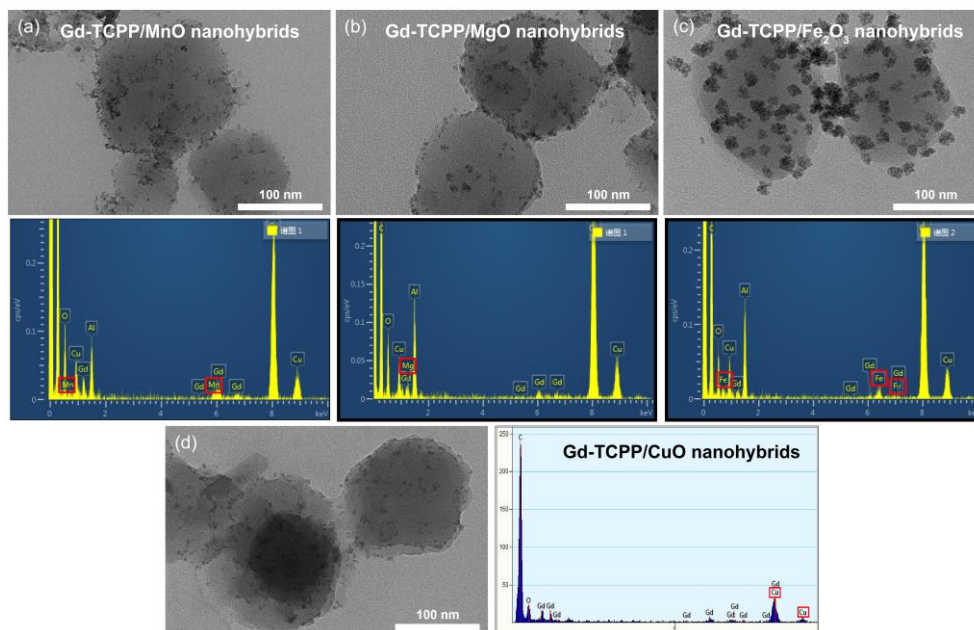

**Figure S8.** TEM and EDS images of (a) Gd-TCPP/MnO, (b) Gd-TCPP/MgO, (c) Gd-TCPP/Fe<sub>2</sub>O<sub>3</sub>, and (d) Gd-TCPP/CuO nanohybrids.

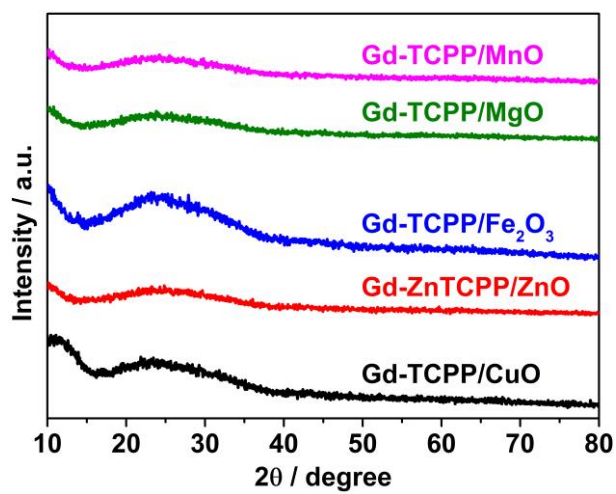

**Figure S9.** XRD patterns of the Gd-TCPP/MnO, Gd-TCPP/MgO, Gd-TCPP/Fe<sub>2</sub>O<sub>3</sub>, Gd-ZnTCPP/ZnO, and Gd-TCPP/CuO nanohybrids.

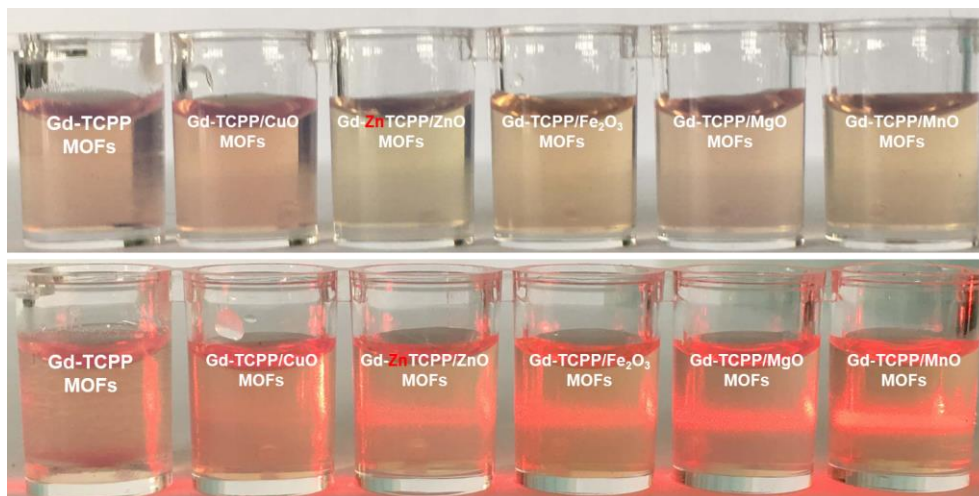

**Figure S10.** Tyndall effect has been observed for the Gd-TCPP, Gd-TCPP/CuO, Gd-ZnTCPP/ZnO, Gd-TCPP/Fe<sub>2</sub>O<sub>3</sub>, Gd-TCPP/MgO, and Gd-TCPP/MnO nanohybrids.

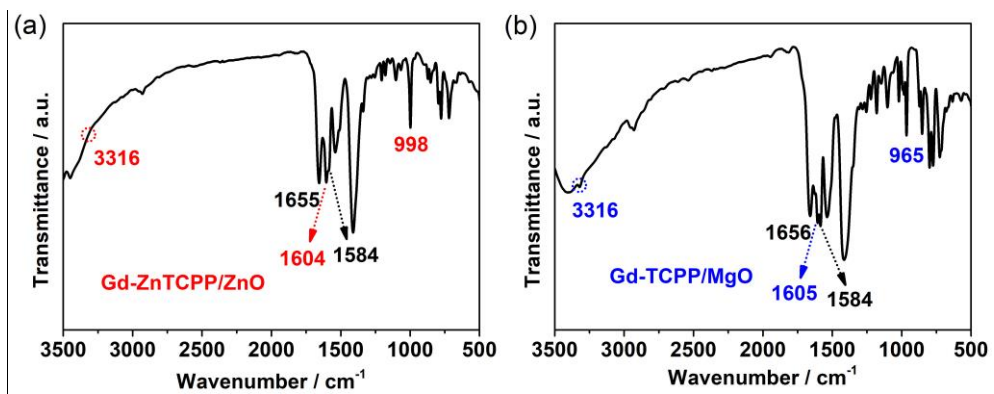

**Figure S11.** FT-IR of the (a) Gd-ZnTCPP/ZnO and (b) Gd-TCPP/MgO nanohybrids.

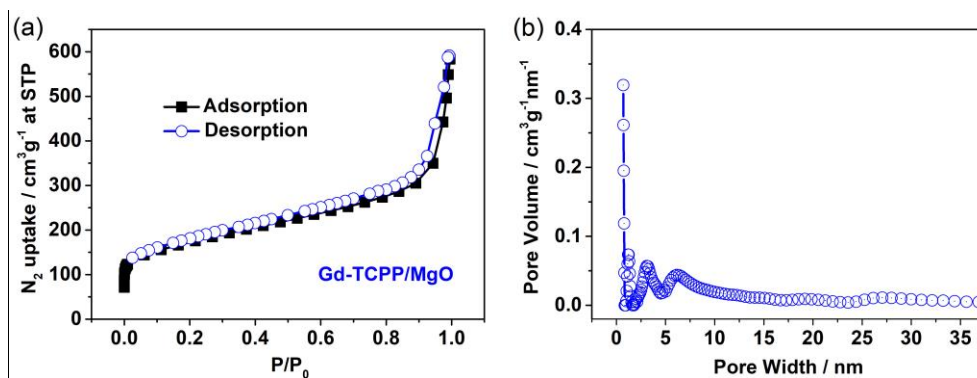

**Figure S12.** (a)  $N_2$  adsorption-desorption isotherms and (b) pore size distribution of the Gd-TCPP/MgO nanohybrids. The Gd-TCPP/MgO shows an approximate type I Langmuir isotherms with a Brunauer-Emmett-Teller surface area of  $608.6 \text{ m}^2 \text{ g}^{-1}$ .

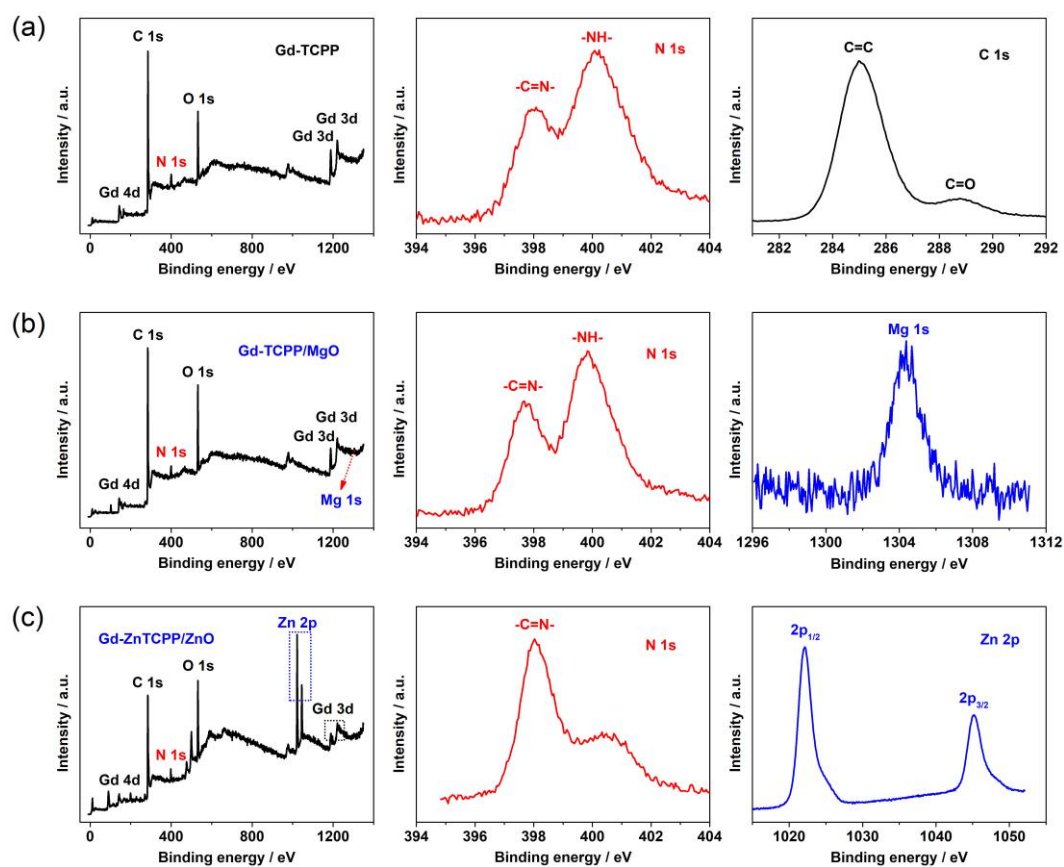

**Figure S13.** (a) Full XPS spectrum, N 1s spectrum, and C 1s spectrum of the Gd-TCPP nanosheets. (b) Full XPS spectrum, N 1s spectrum, and Mg 1s spectrum of the Gd-TCPP/MgO nanohybrids. (c) Full XPS spectrum, N 1s spectrum, and Zn 2p spectrum of the Gd-ZnTCPP/ZnO nanohybrids.

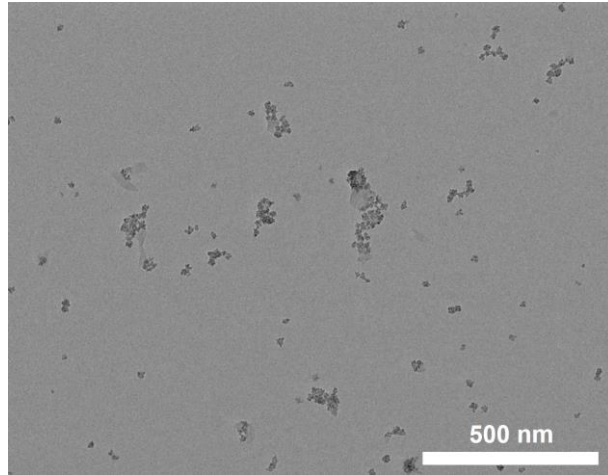

**Figure S14.** TEM image of the acid-treated Gd-TCPP/Fe<sub>2</sub>O<sub>3</sub> nanohybrids.

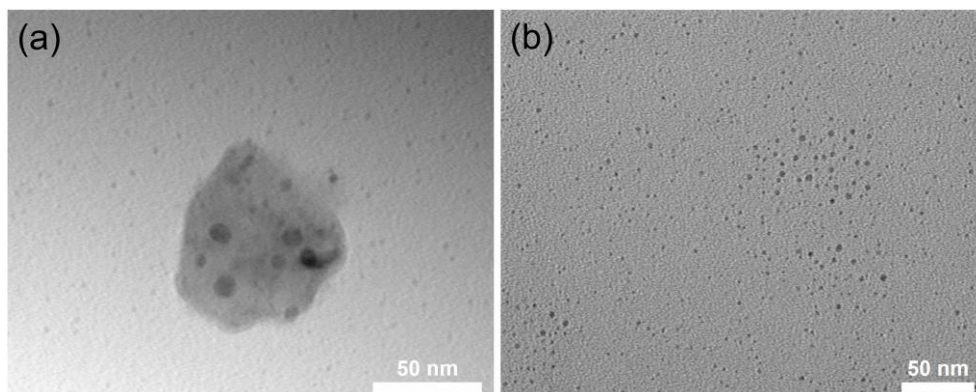

**Figure S15.** TEM images of the acid-treated Gd-ZnTCPP/ZnO nanohybrids.



| MOFs                                                    | Porphyrin             | Porphyrin<br>core | S <sub>BET</sub> (m <sup>2</sup> g <sup>-1</sup> ) | Q-band<br>number | Ref       |
|---------------------------------------------------------|-----------------------|-------------------|----------------------------------------------------|------------------|-----------|
| COF-366-Co                                              | Co(TAP)               | Co                | 1360                                               | 2                | S1        |
| Co-TCPP(Fe)                                             | TCPP(Fe)              | Fe                | -                                                  | 2                | S2        |
| M-UiO                                                   | H <sub>2</sub> DBP-Pt | Pt                | -                                                  | 2                | S3        |
| Zn-TCPP(BP)                                             | TCPP                  | Zn                | 483                                                | 2                | S4        |
| {CuL-[Al(OH) <sub>2</sub> ] <sub>2</sub> } <sub>n</sub> | H <sub>6</sub> L      | Cu                | -                                                  | 2                | S5        |
| Ru-TBP-Zn                                               | H <sub>4</sub> TBP    | Zn                | 422                                                | 2                | S6        |
| Ru-TBP                                                  | H <sub>4</sub> TBP    | None              | 441                                                | 4                | S6        |
| DBP-UiO                                                 | H <sub>2</sub> DBP    | None              | 558                                                | 4                | S7        |
| PCN-222                                                 | H <sub>2</sub> TCPP   | None              | 1728                                               | 4                | S8        |
| Gd-TCPP                                                 | TCPP                  | None              | 646.4                                              | 4                | This work |
| Gd-TCPP/MgO                                             | TCPP                  | None              | 608.6                                              | 4                | This work |
| Gd-(H <sub>2</sub> TCPP) <sup>2+</sup>                  | TCPP                  | H                 | 169.96                                             | 1                | This work |

**Table S1.** Summary of the different porphyrin-based MOFs materials.

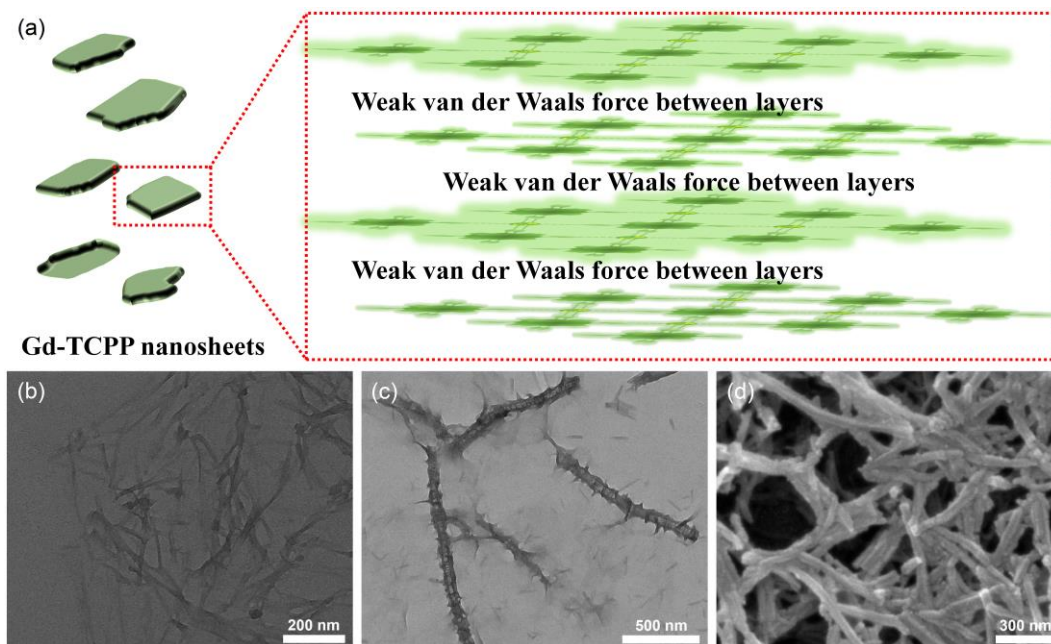

**Figure S16.** (a) Schematic diagram of the layered Gd-TCPP nanosheets. (b, c) TEM and (d) SEM images of the acid-treated Gd-TCPP nanosheets.

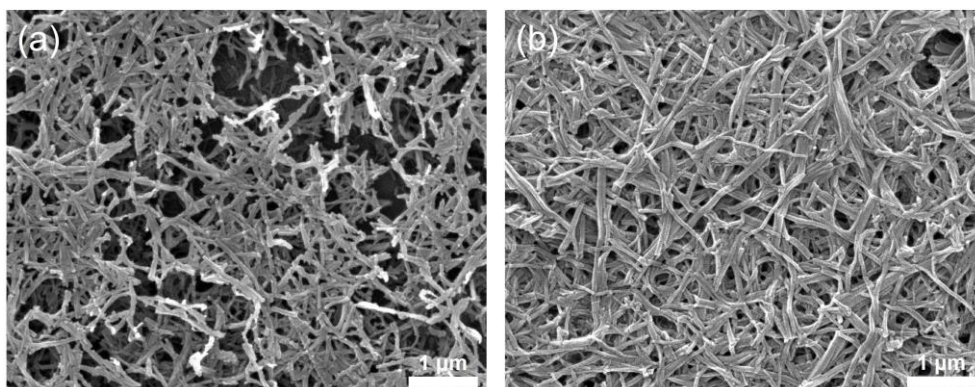

**Figure S17.** SEM images of the Gd-TCPP with the acid-treated at (a) pH=3.0 and (b) pH=0.5.

## References

- S1. S. Lin, C. S. Diercks, Y. B. Zhang, N. Kornienko, E. M. Nichols, Y. Zhao, A. R. Paris, D. Kim, P. Yang, O. M. Yaghi and C. J. Chang, *Science*, 2015, **349**, 1208–1213.
- S2. Y. Wang, M. Zhao, J. Ping, B. Chen, X. Cao, Y. Huang, C. Tan, Q. Ma, S. Wu, Y. Yu, Q. Lu, J. Chen, W. Zhao, Y. Ying and H. Zhang, *Adv. Mater.* 2016, **28**, 4149–4155.
- S3. R. Xu, Y. Wang, X. Duan, K. Lu, D. Micheroni, A. Hu and W. Lin, *J. Am. Chem. Soc.*, 2016, **138**, 2158–2161.
- S4. Y. Zhao, L. Jiang, L. Shanguan, L. Mi, A. Liu and S. Liu, *J. Mater. Chem. A*, 2018, **6**, 2828–2833.
- S5. W. Zhang, J. Lu, X. Gao, P. Li, W. Zhang, Y. Ma, H. Wang and B. Tang, *Angew. Chem. Int. Ed.*, 2018, **57**, 1–6.
- S6. G. Lan, Y. Y. Zhu, S. S. Veroneau, Z. Xu, D. Micheroni and W. Lin, *J. Am. Chem. Soc.*, 2018, **140**, 5326–5329.
- S7. K. Lu, C. He and W. Lin, *J. Am. Chem. Soc.*, 2014, **136**, 16712–16715.
- S8. H. Q. Xu, J. Hu, D. Wang, Z. Li, Q. Zhang, Y. Luo, S. H. Yu and H. L. Jiang, *J. Am. Chem. Soc.*, 2015, **137**, 13440–13443.
